# Supplementary material for: Determination of sulfite in food and beverages using a reliable ratiometric AIE probe
Source: Royal Society of Chemistry journal article supplement (doi:10.1039/d1nj03747a), 2021-01-01
Supplement: d1nj03747a1.pdf [file d1nj03747a1.pdf]

## Supporting Information

### **Determination of sulfite in food and beverages using a reliable ratiometric AIE probe**

Shasha Zhang<sup>a</sup>, Ju Mei<sup>a,\*</sup>

<sup>a</sup>Key Laboratory for Advanced Materials, Feringa Nobel Prize Scientist Joint Research Center, Joint International Research Laboratory for Precision Chemistry and Molecular Engineering, Institute of Fine Chemicals, School of Chemistry & Molecular Engineering, East China University of Science & Technology, Shanghai 200237, P.R. China.

\* E-mail: [daisymeiju@ecust.edu.cn](mailto:daisymeiju@ecust.edu.cn)

## Table of Contents

|                                                                                                                                                                                                                                                                     |      |
|---------------------------------------------------------------------------------------------------------------------------------------------------------------------------------------------------------------------------------------------------------------------|------|
| <b>Scheme S1.</b> Synthetic route to the probe .....                                                                                                                                                                                                                | S-1  |
| <b>Fig. S1.</b> The $^1\text{H}$ NMR spectrum of compound <b>1</b> in $\text{DMSO}-d_6$ .....                                                                                                                                                                       | S-1  |
| <b>Fig. S2.</b> The $^1\text{H}$ NMR spectrum of the probe in $\text{DMSO}-d_6$ .....                                                                                                                                                                               | S-2  |
| <b>Fig. S3.</b> The $^{13}\text{C}$ NMR spectrum of the probe in $\text{CDCl}_3$ .....                                                                                                                                                                              | S-2  |
| <b>Fig. S4.</b> The HRMS of the probe.....                                                                                                                                                                                                                          | S-3  |
| <b>Fig. S5.</b> The DLS results of probe in the mixture of DMSO and water with different water fractions ( $f_w$ s).....                                                                                                                                            | S-4  |
| <b>Fig. S6.</b> The UV-vis spectra of the probe in the DMSO/water mixtures with different $f_w$ s.....                                                                                                                                                              | S-5  |
| <b>Fig. S7.</b> Time-dependent PL spectra of the probe solution containing different concentrations of sulfite.....                                                                                                                                                 | S-5  |
| <b>Fig. S8.</b> (a) The UV-vis spectra and (b) the normalized UV-vis spectra of the probe and $\text{SO}_3^{2-}$ in the $\text{DMSO}/\text{H}_2\text{O}$ (7/3, v/v) solution with different concentrations of $\text{SO}_3^{2-}$ . [probe] = 10 $\mu\text{M}$ ..... | S-6  |
| <b>Fig. S9.</b> (a) The histograms of the probe in the presence of different anions or sulfite. (b) The histograms of probe in the presence of different anions with sulfite.....                                                                                   | S-6  |
| <b>Fig. S10.</b> High resolution mass spectrum of the product of the reaction between probe and $\text{SO}_3^{2-}$ .....                                                                                                                                            | S-7  |
| <b>Fig. S11.</b> (a) Fluorescence spectra of the probe in the sugar samples with different concentrations of sulfite. The photographs of probe for the determination of the sulfite anion in sugar samples taken under (b) daylight and (c) handheld UV lamp.....   | S-7  |
| <b>Table S1.</b> Results for the determination of the sulfite anion in sugar samples for four times.....                                                                                                                                                            | S-8  |
| <b>Fig. S12.</b> The fluorescence spectra of probe in the liquor samples with different concentrations of spiked $\text{SO}_3^{2-}$ .....                                                                                                                           | S-8  |
| <b>Table S2.</b> Results for the determination of the sulfite anion in the liquor samples for four times.....                                                                                                                                                       | S-9  |
| <b>Fig. S13.</b> The fluorescence spectra of probe in the peach brandy samples with different concentrations of spiked $\text{SO}_3^{2-}$ .....                                                                                                                     | S-9  |
| <b>Table S3.</b> Results for the determination of sulfite anion in the peach brandy samples for four times.....                                                                                                                                                     | S-10 |
| <b>Table S4.</b> Results for the determination of sulfite anion in the red wine samples for four times.....                                                                                                                                                         | S-10 |
| <b>Fig. S14.</b> The fluorescence spectra of probe in the beer samples with different concentrations of spiked $\text{SO}_3^{2-}$ .....                                                                                                                             | S-11 |
| <b>Table S5.</b> Results for the determination of sulfite anion in the beer samples for four times.....                                                                                                                                                             | S-11 |

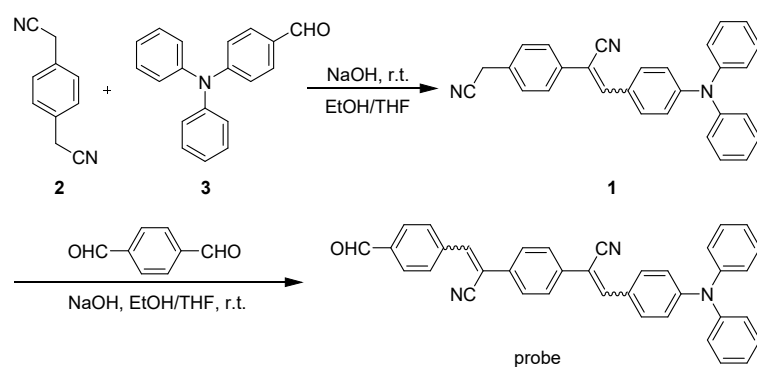

**Scheme S1.** Synthetic route to the probe.

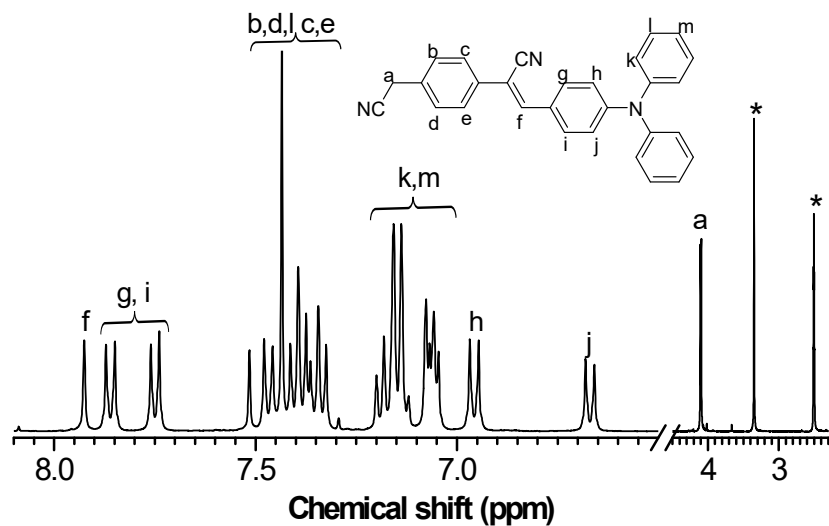

**Fig. S1.** The  $^1\text{H}$  NMR spectrum of compound 1 in  $\text{DMSO-}d_6$ , where the solvent peaks are marked with asterisks.

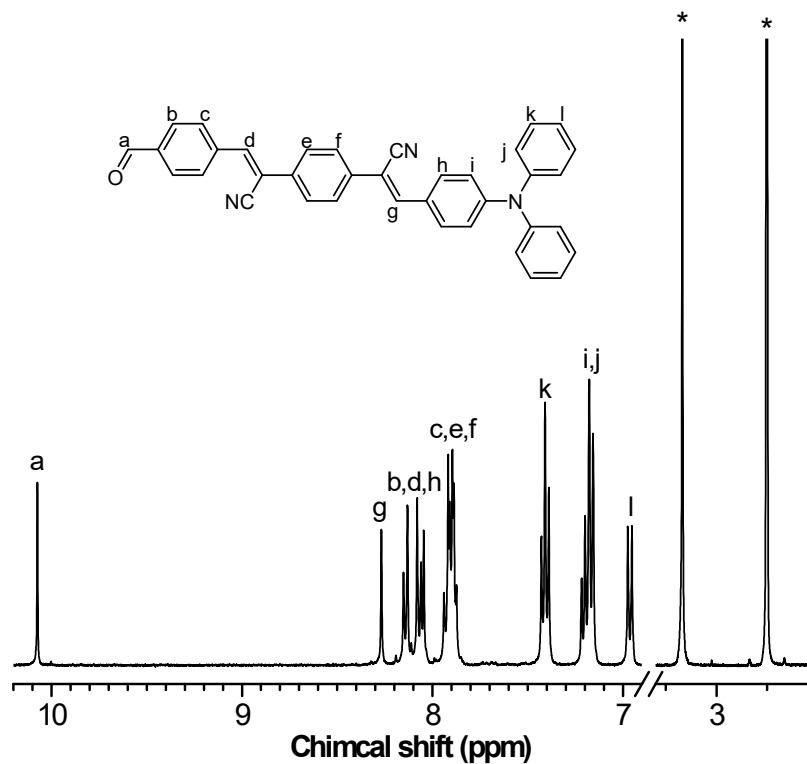

**Fig. S2.** The  $^1\text{H}$  NMR spectrum of the probe in  $\text{DMSO-}d_6$ , where the solvent peaks are marked with asterisks.

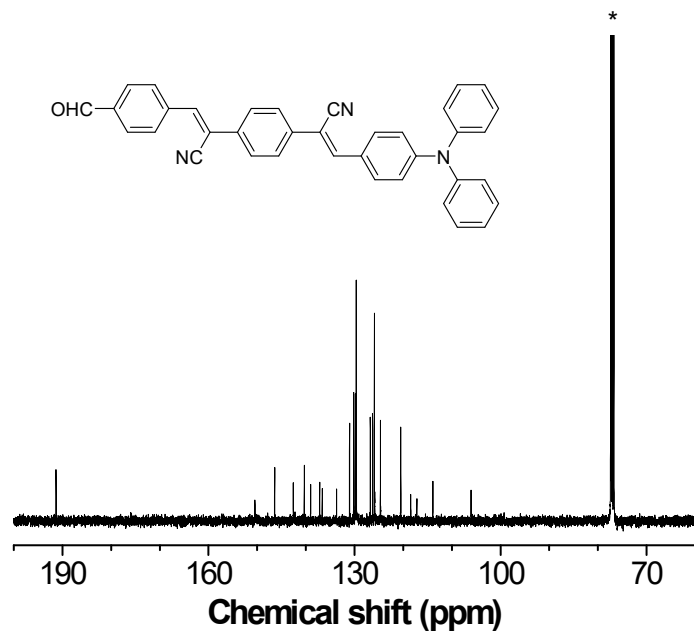

**Fig. S3.** The  $^{13}\text{C}$  NMR spectrum of the probe in  $\text{CDCl}_3$ , where the solvent peaks are marked with asterisks.

MJ-ZSS-030

20212993 8 (0.105) Cm (8-(282:283+288:289))

XEVO-G2TOF#NotSet

06-Sep-202111:06:12

1: TOF MS ES+  
1.40e5

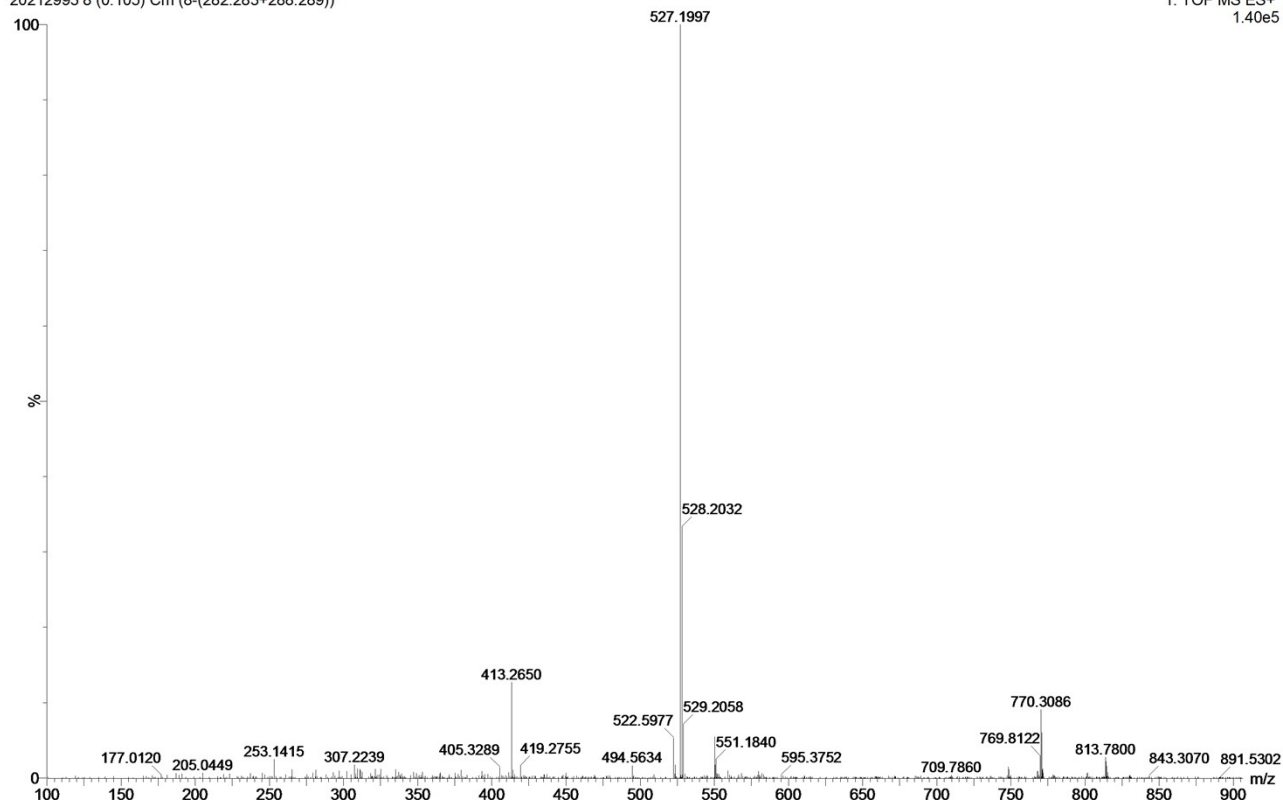

|          |            |      |      |      |       |                      |
|----------|------------|------|------|------|-------|----------------------|
| Minimum: |            |      |      |      |       |                      |
| Maximum: |            | 20.0 | 5.0  | 50.0 |       |                      |
| Mass     | Calc. Mass | mDa  | PPM  | DBE  | i-FIT | i-FIT (Norm) Formula |
| 527.1997 | 527.1998   | -0.1 | -0.2 | 27.0 | 189.4 | C37 H25 N3 O         |

Fig. S4. The HRMS of the probe.

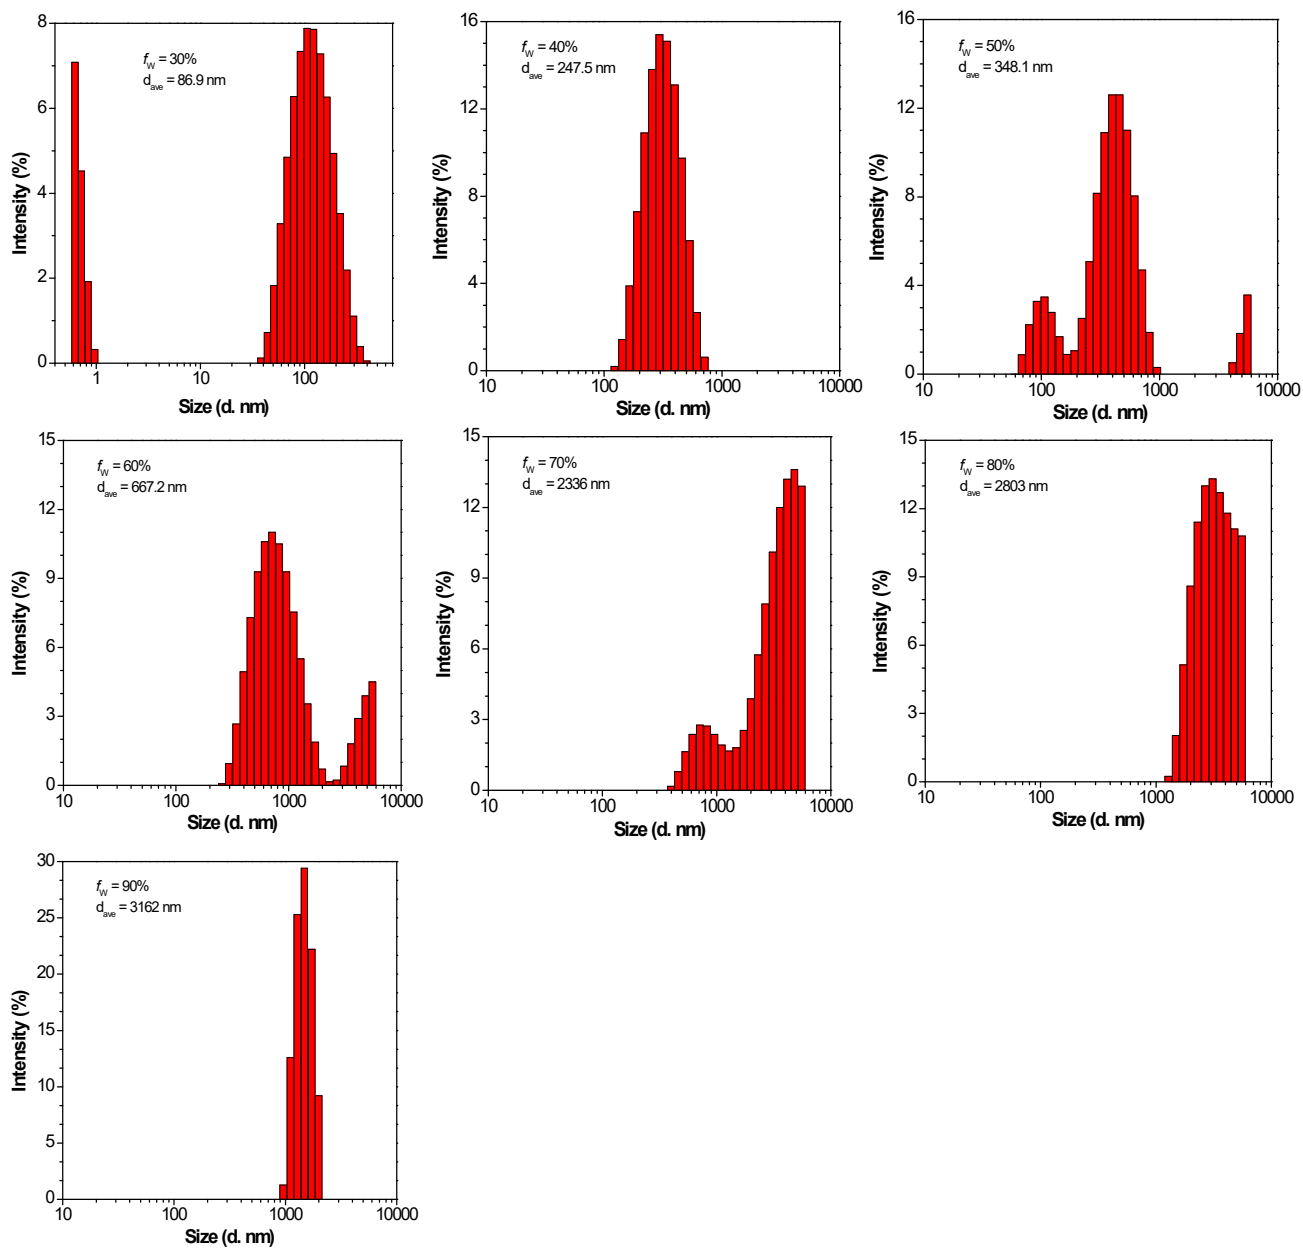

**Fig. S5.** The DLS results of probe in the mixture of DMSO and water with different water fractions ( $f_w$ s).

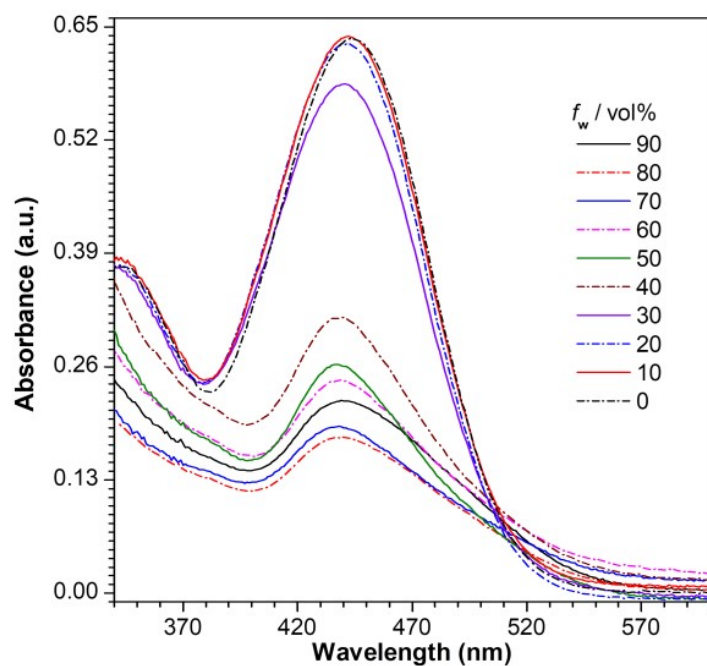

**Fig. S6.** The UV-vis spectra of the probe in the DMSO/water mixtures with different water fractions ( $f_w$ ) at room temperature,  $c = 10 \mu\text{M}$ .

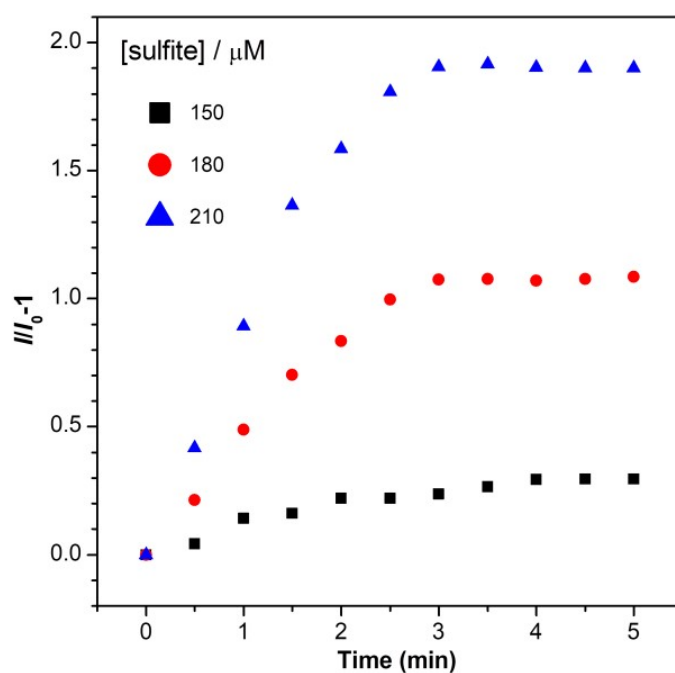

**Fig. S7.** Time-dependence of the fluorescence spectra of the probe solution ( $10 \mu\text{M}$ , in  $\text{DMSO}/\text{H}_2\text{O} = 7/3$  (v/v)) containing different concentrations of sulfite anions. ( $\lambda_{\text{ex}} = 435 \text{ nm}$ ).

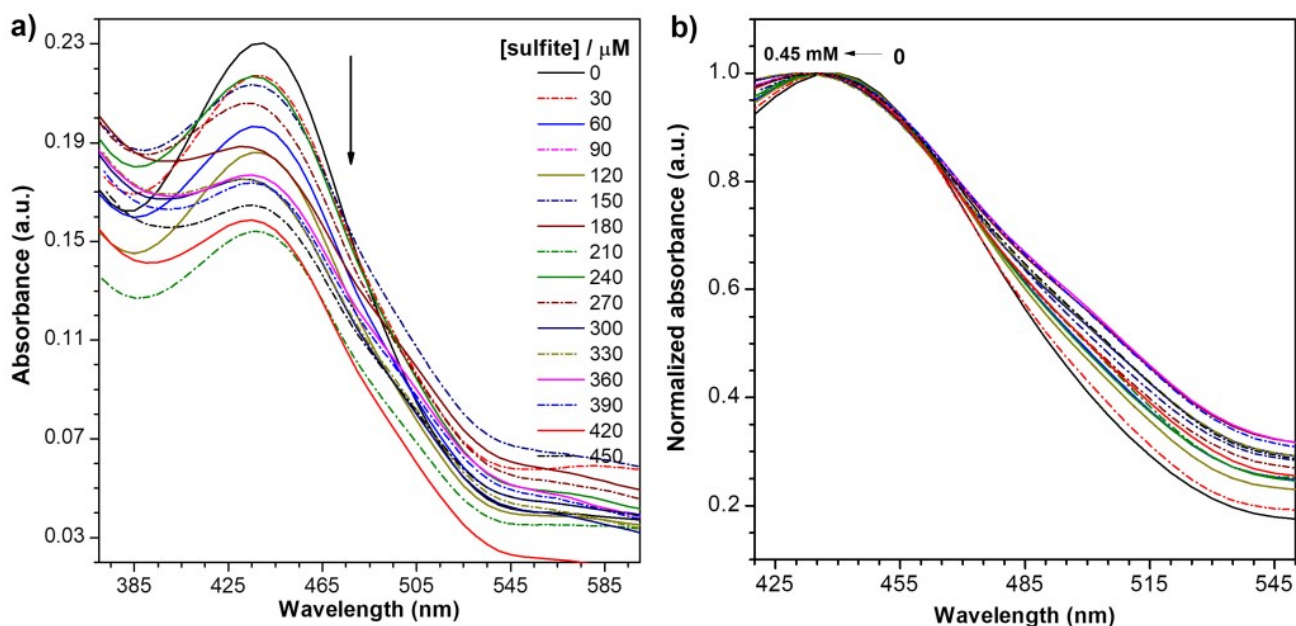

**Fig. S8.** (a) The UV-vis spectra and (b) the normalized UV-vis spectra of the probe and  $\text{SO}_3^{2-}$  in the DMSO/ $\text{H}_2\text{O}$  (7/3, v/v) solutions with different concentrations of  $\text{SO}_3^{2-}$ . [probe] = 10  $\mu\text{M}$ .

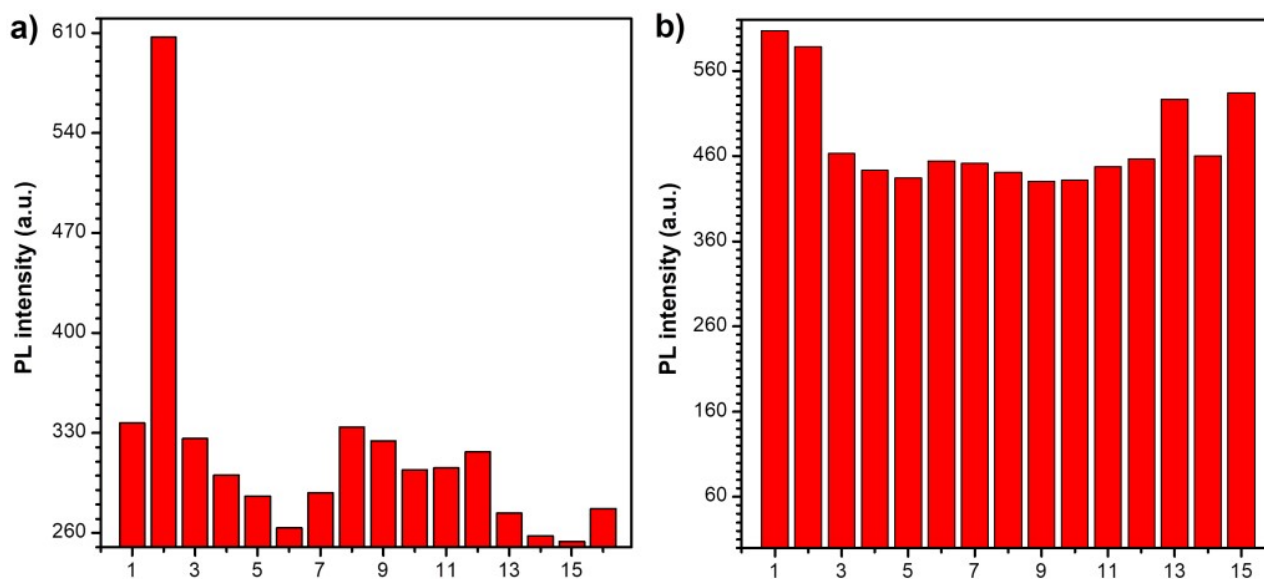

**Fig. S9.** (a) The histograms of the probe in the presence of different anions or sulfite in the DMSO/ $\text{H}_2\text{O}$  (7/3, v/v) mixtures (other species including 1: blank, 2:  $\text{SO}_3^{2-}$ , 3:  $\text{F}^-$ , 4:  $\text{Cl}^-$ , 5:  $\text{Br}^-$ , 6:  $\text{I}^-$ , 7:  $\text{AcO}^-$ , 8:  $\text{ClO}^-$ , 9:  $\text{HS}^-$ , 10:  $\text{HCO}_3^-$ , 11:  $\text{H}_2\text{PO}_4^-$ , 12:  $\text{HSO}_3^-$ , 13:  $\text{SO}_4^{2-}$ , 14:  $\text{CO}_3^{2-}$ , 15:  $\text{HPO}_4^{2-}$ , 16:  $\text{PO}_4^{3-}$ ). (b) The histograms of probe in the presence of different anions with sulfite (other species including 1: blank, 2:  $\text{F}^-$ , 3:  $\text{Cl}^-$ , 4:  $\text{Br}^-$ , 5:  $\text{I}^-$ , 6:  $\text{AcO}^-$ , 7:  $\text{ClO}^-$ , 8:  $\text{HS}^-$ , 9:  $\text{HCO}_3^-$ , 10:  $\text{H}_2\text{PO}_4^-$ , 11:  $\text{HSO}_3^-$ , 12:  $\text{SO}_4^{2-}$ , 13:  $\text{CO}_3^{2-}$ , 14:  $\text{HPO}_4^{2-}$ , 15:  $\text{PO}_4^{3-}$ ).



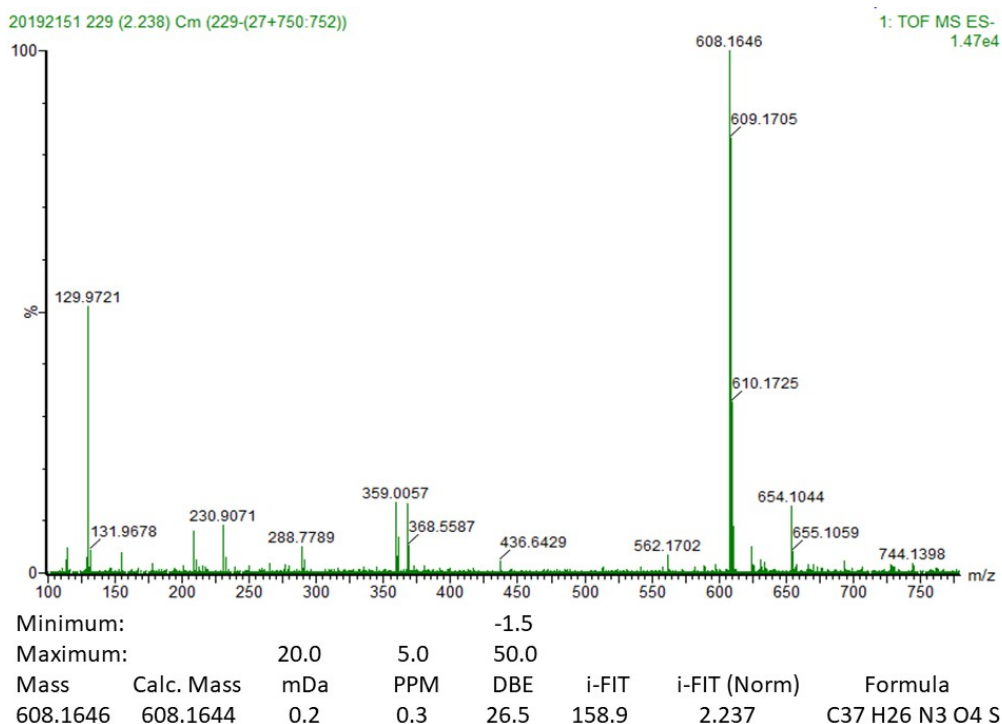

**Fig. S10.** High resolution mass spectrum of the product of the reaction between probe and  $\text{SO}_3^{2-}$ .

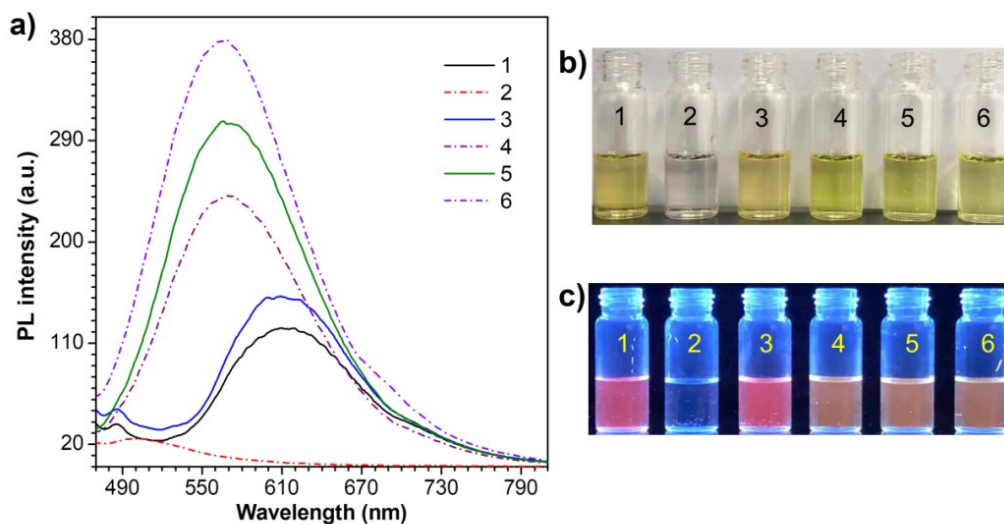

**Fig. S11.** (a) Fluorescence spectra of the probe (10  $\mu\text{M}$ , in  $\text{DMSO}/\text{H}_2\text{O} = 7/3$  (v/v), pH 7.4 0.01 mol/L PBS buffered) in the sugar samples with different concentrations of sulfite upon 37  $^\circ\text{C}$  incubation. The photographs of probe in the  $\text{DMSO}/\text{H}_2\text{O}$  (7/3, v/v) mixture for the determination of the sulfite anion in sugar samples taken under (b) daylight and (c) handheld UV lamp. (1: probe, 2: sugar, 3: probe + sugar, 4: probe + sugar + 160  $\mu\text{M}$   $\text{SO}_3^{2-}$ , 5: probe + sugar + 180  $\mu\text{M}$   $\text{SO}_3^{2-}$ , 6: probe + sugar + 200  $\mu\text{M}$   $\text{SO}_3^{2-}$ ). [probe] = 10  $\mu\text{M}$ .

**Table S1.** Results for the determination of the sulfite anions in sugar samples for four times

| Time | Added $\text{SO}_3^{2-}$<br>( $\mu\text{mol/L}$ ) | Found $\text{SO}_3^{2-}$<br>( $\mu\text{mol/L}$ ) | Determined $\text{SO}_3^{2-}$<br>( $\mu\text{mol/L}$ ) |
|------|---------------------------------------------------|---------------------------------------------------|--------------------------------------------------------|
| 1st  | 160                                               | 174.930                                           | 15.513                                                 |
|      | 180                                               | 195.708                                           |                                                        |
|      | 200                                               | 215.902                                           |                                                        |
| 2nd  | 160                                               | 175.665                                           | 15.721                                                 |
|      | 180                                               | 195.089                                           |                                                        |
|      | 200                                               | 216.408                                           |                                                        |
| 3rd  | 160                                               | 174.020                                           | 14.672                                                 |
|      | 180                                               | 195.045                                           |                                                        |
|      | 200                                               | 214.950                                           |                                                        |
| 4th  | 160                                               | 175.462                                           | 15.094                                                 |
|      | 180                                               | 194.615                                           |                                                        |
|      | 200                                               | 215.206                                           |                                                        |

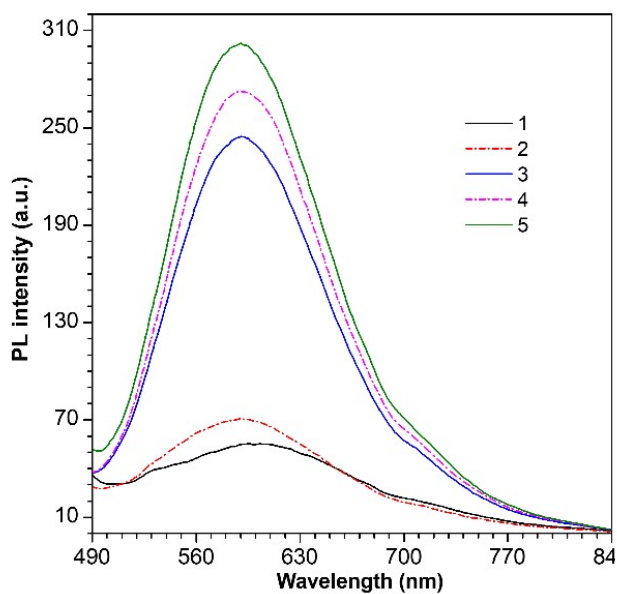**Fig. S12.** The fluorescence spectra of probe in the liquor samples with different concentrations of spiked  $\text{SO}_3^{2-}$  (1: probe, 2: probe + liquor, 3: probe + liquor +  $160 \mu\text{M SO}_3^{2-}$ , 4: probe + liquor +  $180 \mu\text{M SO}_3^{2-}$ , 5: probe + liquor +  $200 \mu\text{M SO}_3^{2-}$ ). [probe] =  $10 \mu\text{M}$ .

**Table S2.** Results for the determination of sulfite anions in the liquor samples for four times

| Time | Added $\text{SO}_3^{2-}$<br>( $\mu\text{mol/L}$ ) | Found $\text{SO}_3^{2-}$<br>( $\mu\text{mol/L}$ ) | Determined $\text{SO}_3^{2-}$<br>( $\mu\text{mol/L}$ ) |
|------|---------------------------------------------------|---------------------------------------------------|--------------------------------------------------------|
| 1st  | 160                                               | 260.541                                           | 99.769                                                 |
|      | 180                                               | 279.062                                           |                                                        |
|      | 200                                               | 299.705                                           |                                                        |
| 2nd  | 160                                               | 259.413                                           | 99.482                                                 |
|      | 180                                               | 278.988                                           |                                                        |
|      | 200                                               | 300.044                                           |                                                        |
| 3rd  | 160                                               | 261.025                                           | 100.446                                                |
|      | 180                                               | 280.423                                           |                                                        |
|      | 200                                               | 299.891                                           |                                                        |
| 4th  | 160                                               | 259.870                                           | 99.990                                                 |
|      | 180                                               | 280.123                                           |                                                        |
|      | 200                                               | 299.976                                           |                                                        |

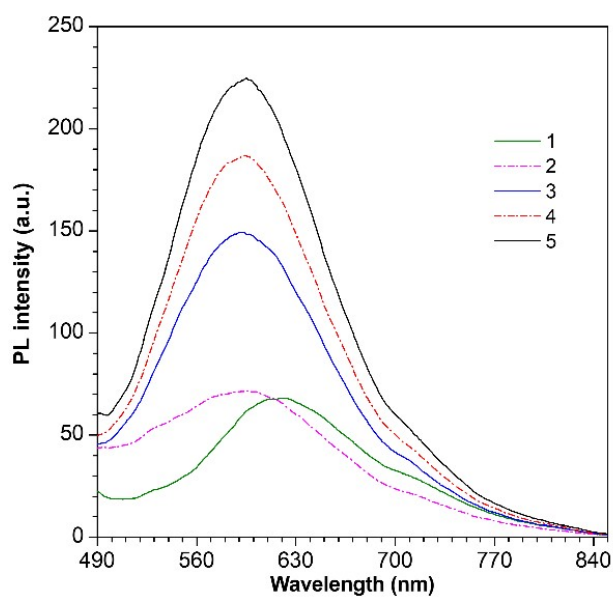**Fig. S13.** The fluorescence spectra of probe in the peach brandy samples with different concentrations of spiked  $\text{SO}_3^{2-}$  (1: probe, 2: probe + peach brandy, 3: probe + peach brandy + 160  $\mu\text{M}$   $\text{SO}_3^{2-}$ , 4: probe + peach brandy + 180  $\mu\text{M}$   $\text{SO}_3^{2-}$ , 5: probe + peach brandy + 200  $\mu\text{M}$   $\text{SO}_3^{2-}$ ). [probe] = 10  $\mu\text{M}$ .

**Table S3.** Results for the determination of sulfite anions in the peach brandy samples for four times

| Time | Added SO <sub>3</sub> <sup>2-</sup><br>(μmol/L) | Found SO <sub>3</sub> <sup>2-</sup><br>(μmol/L) | Determined SO <sub>3</sub> <sup>2-</sup><br>(μmol/L) |
|------|-------------------------------------------------|-------------------------------------------------|------------------------------------------------------|
| 1st  | 160                                             | 186.751                                         | 26.573                                               |
|      | 180                                             | 206.453                                         |                                                      |
|      | 200                                             | 226.514                                         |                                                      |
| 2nd  | 160                                             | 185.982                                         | 26.255                                               |
|      | 180                                             | 206.155                                         |                                                      |
|      | 200                                             | 226.627                                         |                                                      |
| 3rd  | 160                                             | 186.162                                         | 26.287                                               |
|      | 180                                             | 206.253                                         |                                                      |
|      | 200                                             | 226.445                                         |                                                      |
| 4th  | 160                                             | 185.972                                         | 26.288                                               |
|      | 180                                             | 206.694                                         |                                                      |
|      | 200                                             | 226.197                                         |                                                      |

**Table S4.** Results for the determination of the sulfite anions in red wine samples for four times

| Time | Added SO <sub>3</sub> <sup>2-</sup><br>(μmol/L) | Found SO <sub>3</sub> <sup>2-</sup><br>(μmol/L) | Determined SO <sub>3</sub> <sup>2-</sup><br>(μmol/L) |
|------|-------------------------------------------------|-------------------------------------------------|------------------------------------------------------|
| 1st  | 20                                              | 175.230                                         | 155.613                                              |
|      | 30                                              | 185.708                                         |                                                      |
|      | 40                                              | 195.902                                         |                                                      |
| 2nd  | 20                                              | 174.171                                         | 156.070                                              |
|      | 30                                              | 185.031                                         |                                                      |
|      | 40                                              | 196.008                                         |                                                      |
| 3rd  | 20                                              | 174.020                                         | 154.672                                              |
|      | 30                                              | 185.045                                         |                                                      |
|      | 40                                              | 194.950                                         |                                                      |
| 4th  | 20                                              | 175.446                                         | 155.434                                              |
|      | 30                                              | 185.650                                         |                                                      |
|      | 40                                              | 195.206                                         |                                                      |

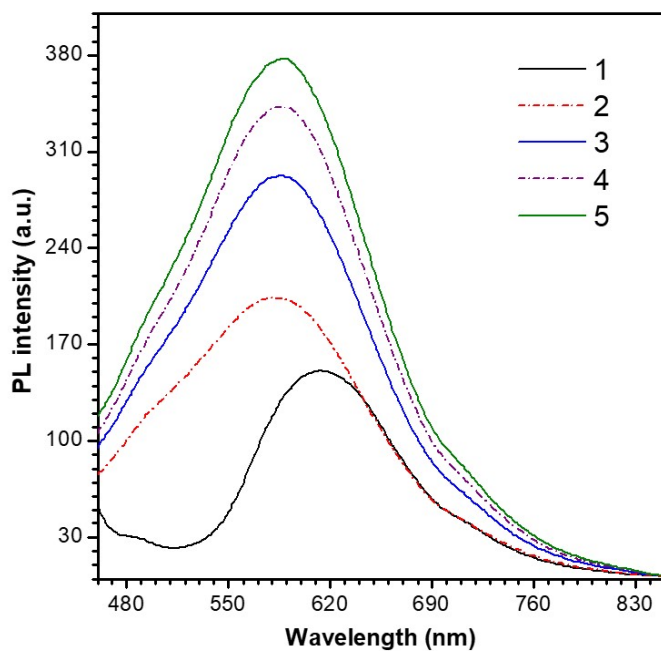

**Fig. S14.** The fluorescence spectra of probe in the beer samples with different concentrations of spiked  $\text{SO}_3^{2-}$  (1: probe, 2: probe + beer, 3: probe + beer + 20  $\mu\text{M}$   $\text{SO}_3^{2-}$ , 4: probe + beer + 30  $\mu\text{M}$   $\text{SO}_3^{2-}$ , 5: probe + beer + 40  $\mu\text{M}$   $\text{SO}_3^{2-}$ ). [probe] = 10  $\mu\text{M}$ .

**Table S5.** Results for the determination of sulfite anions in the beer samples for four times

| Time | Added $\text{SO}_3^{2-}$<br>( $\mu\text{mol/L}$ ) | Found $\text{SO}_3^{2-}$<br>( $\mu\text{mol/L}$ ) | Determined $\text{SO}_3^{2-}$<br>( $\mu\text{mol/L}$ ) |
|------|---------------------------------------------------|---------------------------------------------------|--------------------------------------------------------|
| 1st  | 20                                                | 174.320                                           | 155.826                                                |
|      | 30                                                | 184.332                                           |                                                        |
|      | 40                                                | 195.825                                           |                                                        |
| 2nd  | 20                                                | 175.012                                           | 155.142                                                |
|      | 30                                                | 185.018                                           |                                                        |
|      | 40                                                | 195.395                                           |                                                        |
| 3rd  | 20                                                | 175.273                                           | 155.044                                                |
|      | 30                                                | 185.018                                           |                                                        |
|      | 40                                                | 194.840                                           |                                                        |
| 4th  | 20                                                | 176.446                                           | 156.184                                                |
|      | 30                                                | 185.668                                           |                                                        |
|      | 40                                                | 196.438                                           |                                                        |
